# Supplementary material for: Antimony doped tin(iv) hybrid metal halides with high-efficiency tunable emission, WLED and information encryption
Source: Royal Society of Chemistry journal article supplement (doi:10.1039/d3tc00497j), 2023-01-01
Supplement: d3tc00497j1.pdf [file d3tc00497j1.pdf]

## Supporting Information

**Antimony doped Tin (IV) hybrid metal halides with high efficiency tunable  
emission, WLED and information encryption**

**Wenchao Lin,<sup>a</sup> Qilin Wei,<sup>a</sup> Tao Huang,<sup>a</sup> Xianfu Meng,<sup>a</sup> Ye Tian,<sup>a</sup> Hui Peng,<sup>a, \*</sup>**

**Bingsuo zou <sup>a, \*</sup>**

<sup>a</sup> State Key Laboratory of Featured Metal Materials and Life-cycle Safety for Composite Structures;  
School of Resources, Environments and Materials, Guangxi University, Nanning 530004, China.

\* Corresponding author: Bingsuo Zou · Hui Peng

**Table S1.** Crystal data and structure refinement for (C<sub>13</sub>H<sub>30</sub>N)<sub>2</sub>SnCl<sub>6</sub> single crystal at 296 K.

|                                             |                                                                   |
|---------------------------------------------|-------------------------------------------------------------------|
| Identification code                         | 220826H2_autored                                                  |
| Empirical formula                           | C <sub>26</sub> H <sub>60</sub> Cl <sub>6</sub> N <sub>2</sub> Sn |
| Formula weight                              | 732.15                                                            |
| Temperature/K                               | 296.15(10)                                                        |
| Crystal system                              | triclinic                                                         |
| Space group                                 | P-1                                                               |
| a/Å                                         | 9.8400(6)                                                         |
| b/Å                                         | 10.8858(7)                                                        |
| c/Å                                         | 18.0546(9)                                                        |
| α/°                                         | 105.944(5)                                                        |
| β/°                                         | 97.101(5)                                                         |
| γ/°                                         | 91.271(5)                                                         |
| Volume/Å <sup>3</sup>                       | 1842.08(19)                                                       |
| Z                                           | 2                                                                 |
| ρ <sub>calc</sub> /cm <sup>3</sup>          | 1.320                                                             |
| μ/mm <sup>-1</sup>                          | 1.146                                                             |
| F(000)                                      | 764.0                                                             |
| Crystal size/mm <sup>3</sup>                |                                                                   |
| Radiation                                   | Mo Kα (λ = 0.71073)                                               |
| 2θ range for data collection                | 4.178 to 60.838                                                   |
| Index ranges                                | -12 ≤ h ≤ 13, -9 ≤ k ≤ 15, -25 ≤ l ≤ 16                           |
| Reflections collected                       | 11745                                                             |
| Independent reflections                     | 8721 [R <sub>int</sub> = 0.0138, R <sub>sigma</sub> = 0.0293]     |
| Data/restraints/parameters                  | 8721/8/362                                                        |
| Goodness-of-fit on F <sup>2</sup>           | 1.020                                                             |
| Final R indexes [I ≥ 2σ (I)]                | R <sub>1</sub> = 0.0500, wR <sub>2</sub> = 0.1184                 |
| Final R indexes [all data]                  | R <sub>1</sub> = 0.0726, wR <sub>2</sub> = 0.1298                 |
| Largest diff. peak/hole / e Å <sup>-3</sup> | 0.63/-0.97                                                        |

**Table S2.** Fractional Atomic Coordinates ( $\times 10^4$ ) and Equivalent Isotropic Displacement Parameters $(\text{\AA}^2 \times 10^3)$  for  $(\text{C}_{13}\text{H}_{30}\text{N})_2\text{SnCl}_6$ .  $U_{\text{eq}}$  is defined as 1/3 of the trace of the orthogonalised  $U_{ij}$  tensor.

| Atom | <i>x</i>   | <i>y</i>   | <i>z</i>  | U(eq)     |
|------|------------|------------|-----------|-----------|
| Sn1  | 2540.1(2)  | 3411.9(2)  | 7140.8(2) | 50.77(10) |
| Cl1  | 721.8(10)  | 4645.9(11) | 6695.9(7) | 70.7(3)   |
| Cl2  | 2267.0(16) | 1929.8(13) | 5846.6(8) | 94.8(4)   |
| Cl3  | 839.8(12)  | 2108.5(12) | 7493.1(9) | 88.6(4)   |
| Cl4  | 4231.6(11) | 4679.1(12) | 6759.6(8) | 82.3(3)   |
| Cl5  | 2742.6(14) | 4916.1(13) | 8422.1(7) | 88.3(4)   |
| Cl6  | 4332.8(11) | 2191.0(12) | 7580.1(8) | 82.4(3)   |
| N1   | 7969(3)    | 4815(4)    | 8480(2)   | 73.4(10)  |
| C2   | 9703(8)    | 7815(7)    | 8192(5)   | 141(3)    |
| C3   | 6188(12)   | 8155(9)    | 10469(7)  | 214(5)    |
| C5   | 9312(11)   | 8747(10)   | 7793(6)   | 191(4)    |
| C7   | 8627(9)    | 2104(7)    | 9472(5)   | 144(3)    |
| C9   | 7021(7)    | 6273(8)    | 9627(4)   | 145(3)    |
| C10  | 9028(5)    | 5820(5)    | 8475(3)   | 88.7(15)  |
| C14  | 7527(5)    | 4026(5)    | 7655(3)   | 87.1(15)  |
| C18  | 8680(5)    | 3979(5)    | 8936(3)   | 87.3(15)  |
| C19  | 7832(11)   | 1043(9)    | 9623(6)   | 186(4)    |
| C20  | 6706(5)    | 5380(5)    | 8822(3)   | 85.4(14)  |
| C21  | 5838(9)    | 6941(8)    | 9925(5)   | 158(3)    |
| C22  | 8560(6)    | 6787(6)    | 8064(4)   | 106.9(19) |
| C24  | 7804(7)    | 2880(6)    | 9024(4)   | 106.8(18) |
| N2   | 2080(4)    | 7859(4)    | 5640(2)   | 75.4(10)  |
| C1   | 2776(4)    | 5651(4)    | 4916(3)   | 71.0(11)  |
| C4   | 1636(4)    | 6501(4)    | 5194(3)   | 71.7(11)  |
| C6   | 2236(6)    | 8576(5)    | 4440(3)   | 94.0(16)  |
| C8   | 2206(5)    | 4307(5)    | 4543(3)   | 83.5(13)  |
| C11  | 3163(14)   | 8943(10)   | 7012(6)   | 114(4)    |
| C12  | 2914(5)    | 8499(5)    | 5200(3)   | 84.1(14)  |
| C13  | 2828(10)   | 7639(8)    | 6412(5)   | 68(2)     |
| C15  | 3343(8)    | 9227(7)    | 4083(4)   | 125(2)    |
| C16  | 810(5)     | 8578(6)    | 5811(3)   | 95.9(16)  |
| C17  | 2741(9)    | 9586(7)    | 3432(5)   | 142(3)    |
| C23  | 5067(15)   | 8470(20)   | 7874(11)  | 193(9)    |
| C25  | 3639(16)   | 8704(15)   | 7812(7)   | 127(5)    |
| C26  | 3312(6)    | 3410(5)    | 4249(4)   | 103.2(17) |
| C25A | 3830(30)   | 8320(20)   | 8291(13)  | 164(11)   |
| C23A | 4350(20)   | 8510(20)   | 7615(9)   | 119(8)    |
| C11A | 2958(19)   | 8040(20)   | 7045(10)  | 134(9)    |
| C13A | 3209(15)   | 8372(17)   | 6357(8)   | 93(5)     |

**Table S3.** Anisotropic Displacement Parameters ( $\text{\AA}^2 \times 10^3$ ) for  $(\text{C}_{13}\text{H}_{30}\text{N})_2\text{SnCl}_6$ . The Anisotropic displacement factor exponent takes the form:  $-2\pi^2[h^2a^*2U_{11}+2hka^*b^*U_{12}+\dots]$ .

| Atom | $U_{11}$  | $U_{22}$  | $U_{33}$  | $U_{23}$  | $U_{13}$ | $U_{12}$ |
|------|-----------|-----------|-----------|-----------|----------|----------|
| Sn1  | 42.85(14) | 45.62(14) | 62.38(17) | 15.71(11) | 0.79(10) | -0.89(9) |
| Cl1  | 57.4(5)   | 76.2(7)   | 79.9(7)   | 28.5(5)   | -1.9(5)  | 14.9(5)  |
| Cl2  | 108.8(10) | 74.4(7)   | 81.7(8)   | -7.7(6)   | 5.6(7)   | 5.9(7)   |
| Cl3  | 63.6(6)   | 77.9(7)   | 135.2(11) | 42.7(7)   | 27.4(7)  | -6.3(5)  |
| Cl4  | 61.0(6)   | 83.4(7)   | 118.4(9)  | 57.0(7)   | 9.2(6)   | -6.6(5)  |
| Cl5  | 87.8(8)   | 91.1(8)   | 68.0(7)   | 0.0(6)    | -7.9(6)  | 8.6(7)   |
| Cl6  | 59.3(6)   | 78.4(7)   | 126.0(10) | 55.8(7)   | 10.9(6)  | 15.6(5)  |
| N1   | 50.2(18)  | 94(3)     | 63(2)     | 3.4(19)   | 0.5(15)  | -0.3(18) |
| C2   | 146(7)    | 116(6)    | 170(7)    | 48(5)     | 40(6)    | -13(5)   |
| C3   | 241(13)   | 130(8)    | 249(12)   | 0(8)      | 73(10)   | 10(8)    |
| C5   | 234(12)   | 176(9)    | 198(10)   | 81(8)     | 100(9)   | 15(8)    |
| C7   | 152(7)    | 115(6)    | 151(7)    | 41(5)     | -34(5)   | -17(5)   |
| C9   | 110(5)    | 183(8)    | 102(5)    | -33(5)    | 31(4)    | 17(5)    |
| C10  | 62(3)     | 94(4)     | 98(4)     | 8(3)      | 10(3)    | -8(2)    |
| C14  | 64(3)     | 110(4)    | 68(3)     | -2(3)     | -1(2)    | -3(3)    |
| C18  | 69(3)     | 98(4)     | 78(3)     | 7(3)      | -11(2)   | 4(3)     |
| C19  | 235(12)   | 164(9)    | 169(8)    | 80(7)     | -4(8)    | 7(8)     |
| C20  | 61(3)     | 104(4)    | 88(3)     | 16(3)     | 19(2)    | 12(2)    |
| C21  | 153(7)    | 159(7)    | 125(6)    | -35(5)    | 48(5)    | 20(6)    |
| C22  | 95(4)     | 113(5)    | 113(4)    | 22(4)     | 37(4)    | 3(4)     |
| C24  | 103(4)    | 123(5)    | 91(4)     | 32(4)     | -6(3)    | -3(4)    |
| N2   | 61(2)     | 98(3)     | 60(2)     | 12(2)     | 2.6(16)  | 14.9(19) |
| C1   | 61(2)     | 78(3)     | 82(3)     | 32(2)     | 13(2)    | 6(2)     |
| C4   | 61(2)     | 86(3)     | 74(3)     | 33(2)     | 8(2)     | 5(2)     |
| C6   | 110(4)    | 74(3)     | 106(4)    | 26(3)     | 39(3)    | 7(3)     |
| C8   | 67(3)     | 79(3)     | 113(4)    | 43(3)     | 7(3)     | 5(2)     |

|      |         |         |         |         |         |         |
|------|---------|---------|---------|---------|---------|---------|
| C11  | 179(12) | 72(6)   | 70(6)   | 5(5)    | -31(6)  | 18(7)   |
| C12  | 73(3)   | 67(3)   | 97(4)   | 0(3)    | 11(3)   | -6(2)   |
| C13  | 88(5)   | 55(4)   | 57(5)   | 23(4)   | -10(4)  | -5(4)   |
| C15  | 153(7)  | 117(5)  | 111(5)  | 38(4)   | 25(5)   | 9(5)    |
| C16  | 85(3)   | 120(4)  | 86(3)   | 27(3)   | 21(3)   | 34(3)   |
| C17  | 167(8)  | 100(5)  | 166(7)  | 39(5)   | 53(6)   | -1(5)   |
| C23  | 133(14) | 260(20) | 192(19) | 109(17) | -37(13) | -31(15) |
| C25  | 175(17) | 120(10) | 64(9)   | 0(7)    | -9(9)   | 5(10)   |
| C26  | 84(4)   | 85(4)   | 138(5)  | 26(3)   | 17(3)   | 14(3)   |
| C25A | 210(30) | 141(18) | 135(19) | 54(15)  | -40(18) | -42(17) |
| C23A | 106(16) | 176(19) | 48(9)   | -13(10) | -2(9)   | 47(15)  |
| C11A | 180(20) | 151(19) | 82(13)  | 49(13)  | 24(12)  | 86(17)  |
| C13A | 85(9)   | 83(11)  | 94(11)  | 5(9)    | -8(7)   | -1(8)   |

**Table S4.** Bond Lengths for  $(C_{13}H_{30}N)_2SnCl_6$ .

| Atom | Atom | Length/Å   | Atom | Atom | Length/Å  |
|------|------|------------|------|------|-----------|
| Sn1  | Cl1  | 2.4485(10) | C18  | C24  | 1.514(8)  |
| Sn1  | Cl2  | 2.4269(12) | N2   | C4   | 1.502(6)  |
| Sn1  | Cl3  | 2.4229(11) | N2   | C12  | 1.493(6)  |
| Sn1  | Cl4  | 2.4187(11) | N2   | C13  | 1.575(8)  |
| Sn1  | Cl5  | 2.4214(12) | N2   | C16  | 1.509(6)  |
| Sn1  | Cl6  | 2.4175(10) | N2   | C13A | 1.563(14) |
| N1   | C10  | 1.496(6)   | C1   | C4   | 1.516(6)  |
| N1   | C14  | 1.506(5)   | C1   | C8   | 1.496(6)  |

|     |     |           |      |      |           |
|-----|-----|-----------|------|------|-----------|
| N1  | C18 | 1.515(6)  | C6   | C12  | 1.474(7)  |
| N1  | C20 | 1.523(6)  | C6   | C15  | 1.580(9)  |
| C2  | C5  | 1.431(11) | C8   | C26  | 1.525(7)  |
| C2  | C22 | 1.520(9)  | C11  | C13  | 1.531(13) |
| C3  | C21 | 1.419(11) | C11  | C25  | 1.555(11) |
| C7  | C19 | 1.485(11) | C15  | C17  | 1.405(10) |
| C7  | C24 | 1.506(9)  | C23  | C25  | 1.430(12) |
| C9  | C20 | 1.501(8)  | C25A | C23A | 1.443(17) |
| C9  | C21 | 1.466(9)  | C23A | C11A | 1.590(17) |
| C10 | C22 | 1.496(8)  | C11A | C13A | 1.432(17) |

**Table S5.** Bond Angles for  $(C_{13}H_{30}N)_2SnCl_6$ .

| Atom | Atom | Atom | Angle/°   | Atom | Atom | Atom | Angle/°  |
|------|------|------|-----------|------|------|------|----------|
| Cl2  | Sn1  | Cl1  | 89.06(5)  | C9   | C20  | N1   | 113.8(4) |
| Cl3  | Sn1  | Cl1  | 90.03(4)  | C3   | C21  | C9   | 113.9(8) |
| Cl3  | Sn1  | Cl2  | 89.09(5)  | C10  | C22  | C2   | 109.3(6) |
| Cl4  | Sn1  | Cl1  | 89.96(4)  | C7   | C24  | C18  | 111.0(5) |
| Cl4  | Sn1  | Cl2  | 89.60(5)  | C4   | N2   | C13  | 99.9(4)  |
| Cl4  | Sn1  | Cl3  | 178.69(5) | C4   | N2   | C16  | 108.0(4) |
| Cl4  | Sn1  | Cl5  | 90.92(5)  | C4   | N2   | C13A | 129.1(7) |
| Cl5  | Sn1  | Cl1  | 89.20(4)  | C12  | N2   | C4   | 112.2(3) |
| Cl5  | Sn1  | Cl2  | 178.18(5) | C12  | N2   | C13  | 117.0(5) |
| Cl5  | Sn1  | Cl3  | 90.39(5)  | C12  | N2   | C16  | 109.8(4) |
| Cl6  | Sn1  | Cl1  | 179.91(4) | C12  | N2   | C13A | 87.7(7)  |

|     |     |     |          |      |      |      |           |
|-----|-----|-----|----------|------|------|------|-----------|
| Cl6 | Sn1 | Cl2 | 90.91(5) | C16  | N2   | C13  | 109.3(5)  |
| Cl6 | Sn1 | Cl3 | 89.89(4) | C16  | N2   | C13A | 107.8(7)  |
| Cl6 | Sn1 | Cl4 | 90.13(4) | C8   | C1   | C4   | 110.0(4)  |
| Cl6 | Sn1 | Cl5 | 90.83(5) | N2   | C4   | C1   | 115.7(4)  |
| C10 | N1  | C14 | 108.4(4) | C12  | C6   | C15  | 105.9(5)  |
| C10 | N1  | C18 | 106.0(4) | C1   | C8   | C26  | 112.1(4)  |
| C10 | N1  | C20 | 112.7(4) | C13  | C11  | C25  | 107.8(10) |
| C14 | N1  | C18 | 109.2(4) | C6   | C12  | N2   | 116.0(4)  |
| C14 | N1  | C20 | 108.4(3) | C11  | C13  | N2   | 108.5(7)  |
| C18 | N1  | C20 | 112.1(4) | C17  | C15  | C6   | 111.1(7)  |
| C5  | C2  | C22 | 111.2(8) | C23  | C25  | C11  | 109.7(13) |
| C19 | C7  | C24 | 114.8(7) | C25A | C23A | C11A | 95.1(18)  |
| C21 | C9  | C20 | 114.2(6) | C13A | C11A | C23A | 103.2(15) |
| C22 | C10 | N1  | 116.1(4) | C11A | C13A | N2   | 115.2(15) |
| C24 | C18 | N1  | 115.9(4) |      |      |      |           |

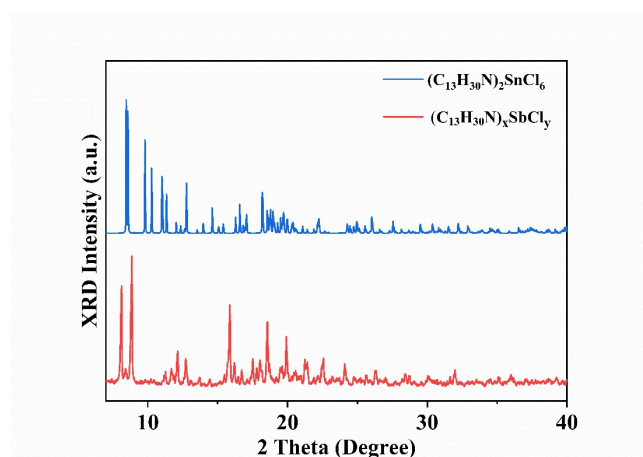

**Figure S1.** The simulated and experimental powder X-ray diffraction patterns of  $(C_{13}H_{30}N)_2SnCl_6$  and  $(C_{13}H_{30}N)_xSbCl_y$ .

**Table S6.** Elements content of  $(C_{13}H_{30}N)_2SnCl_6:20\%Sb$  from the quantitative analysis of EDS data.

| Sample                           | Sn (At %) | Sb (At %) | Cl (At %) | Sb/(Sn+Sb) |
|----------------------------------|-----------|-----------|-----------|------------|
| $(C_{13}H_{30}N)_2SnCl_6:20\%Sb$ | 13.44     | 1.80      | 84.77     | 11.81%     |

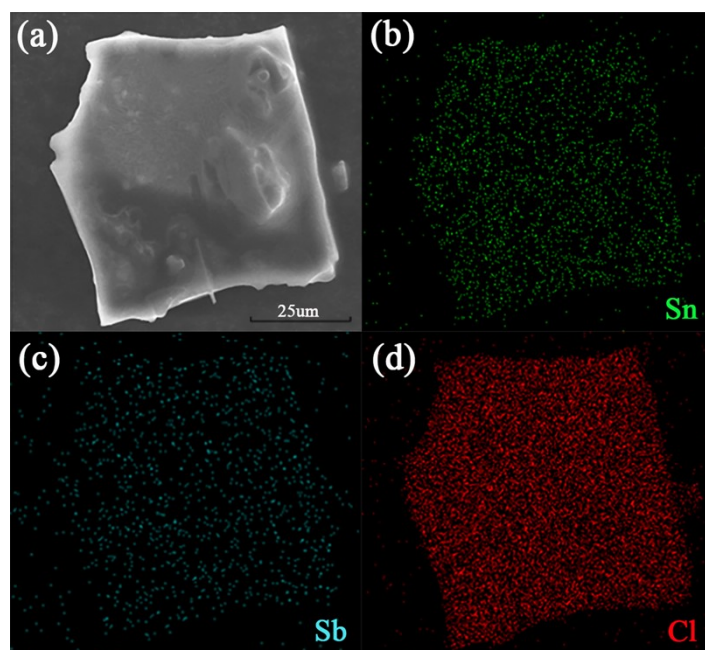

**Figure S2.** SEM image of  $(C_{13}H_{30}N)_2SnCl_6:20\%Sb$  (a) and corresponding EDS mappings of Sn(b), Sb(c) and Cl(d) elements.



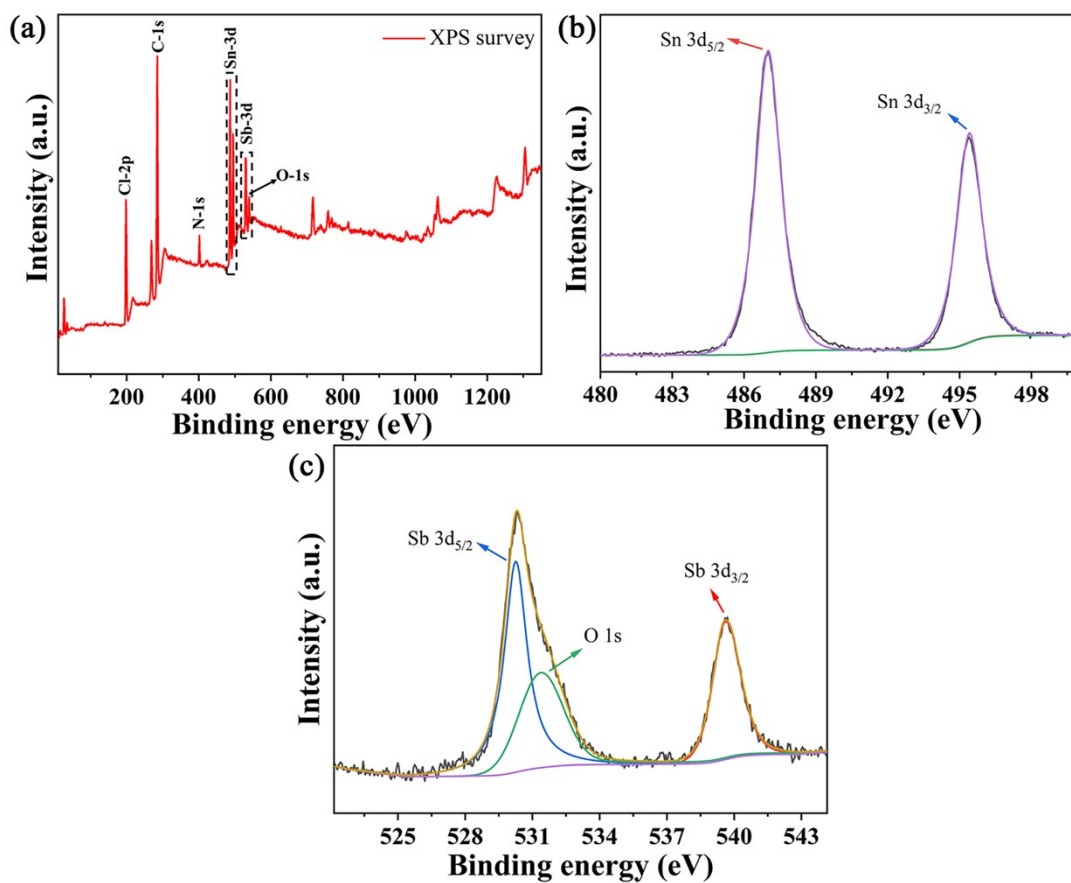

**Figure S3.** (a) XPS spectrum for the  $(C_{13}H_{30}N)_2SnCl_6:20\%Sb$  powder, (b) Sn 3d XPS spectrum, (c) Sb 3d XPS spectrum.

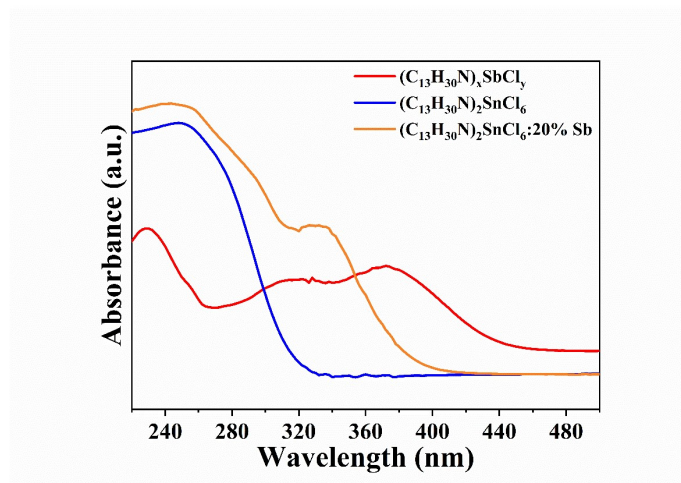

**Figure S4.** Absorption spectra of  $(C_{13}H_{30}N)_xSnCl_6$ ,  $(C_{13}H_{30}N)_2SnCl_6$  and  $(C_{13}H_{30}N)_2SnCl_6:20\%Sb$ .

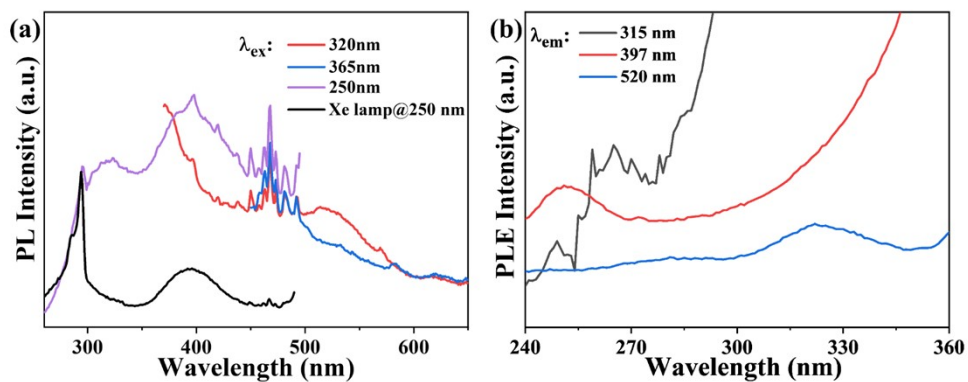

**Figure S5.** PL (a) and PLE (b) spectra of  $(C_{13}H_{30}N)_2SnCl_6$  monitored at different wavelengths.

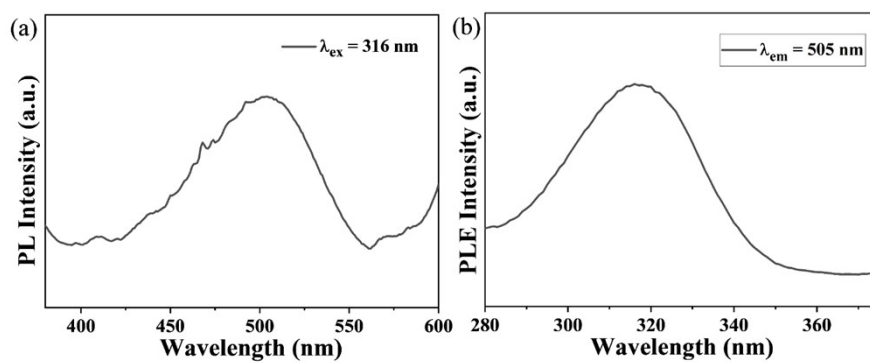

**Figure S6.** PL (a) and PLE (b) spectra of  $C_{13}H_{30}NCl$ .

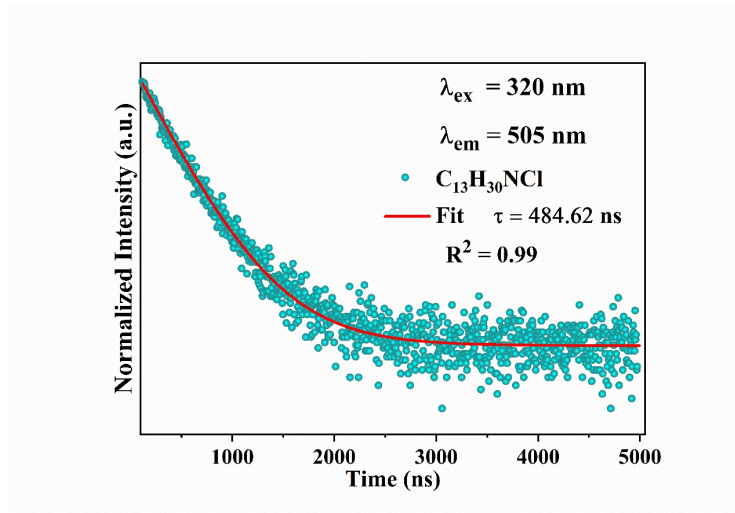

**Figure S7.** The lifetime decay curves of the  $C_{13}H_{30}NCl$  for the 505 nm emission ( $\lambda_{ex} = 320$  nm).

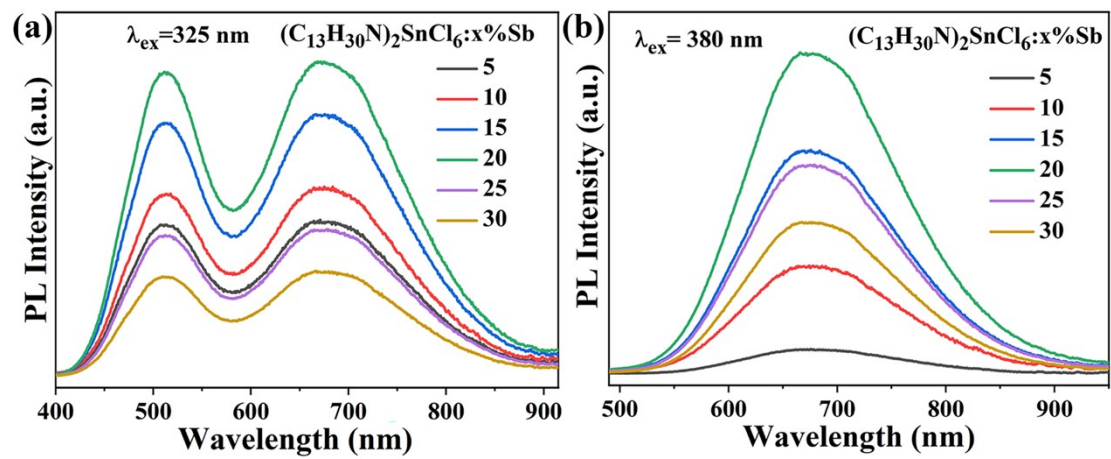

**Figure S8.** PL spectra of  $(C_{13}H_{30}N)_2SnCl_6:x\%Sb$  under different excitations.

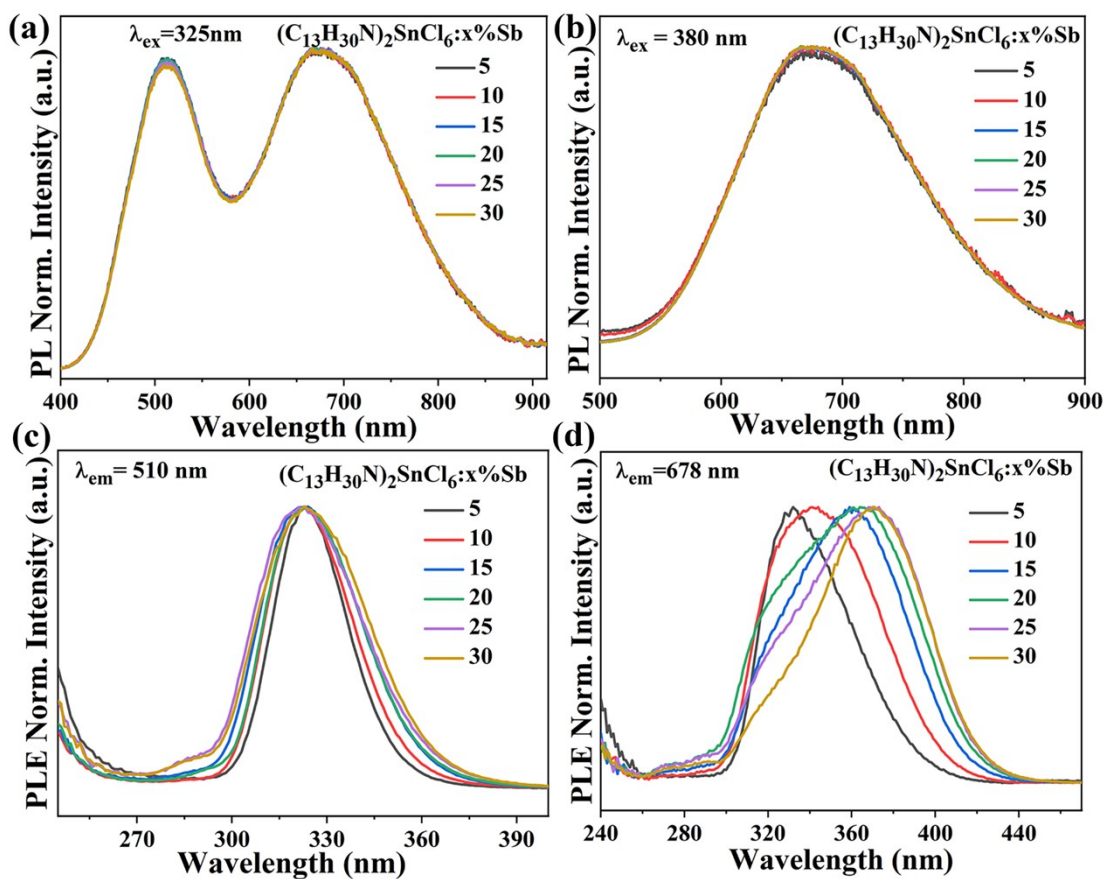

Figure S9. Normalized PL and PLE spectra monitored at different wavelengths of  $(C_{13}H_{30}N)_2SnCl_6:x\%Sb$ .

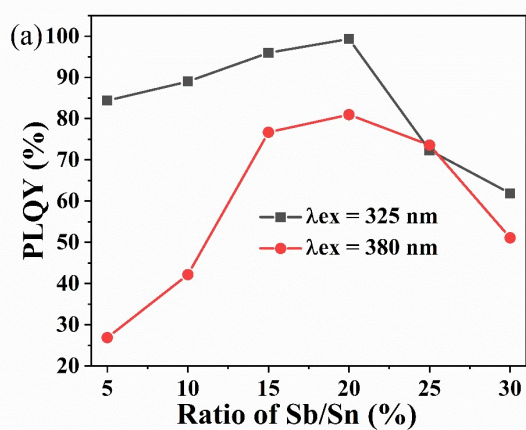

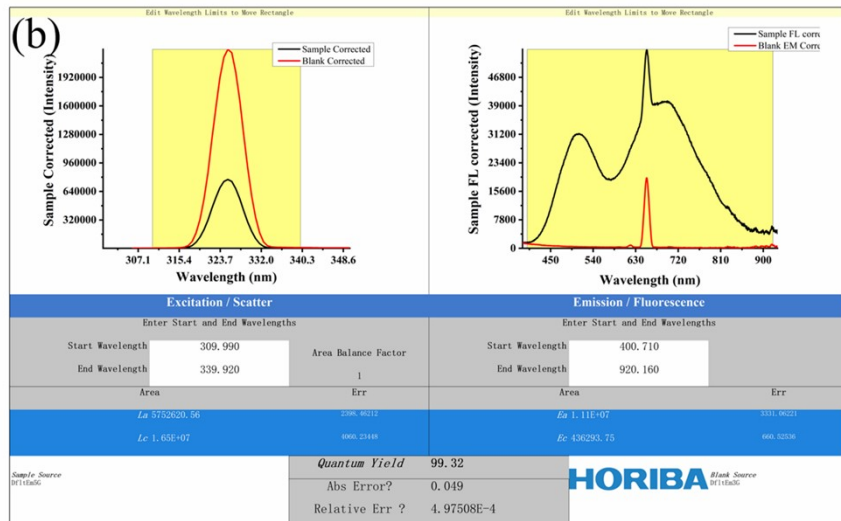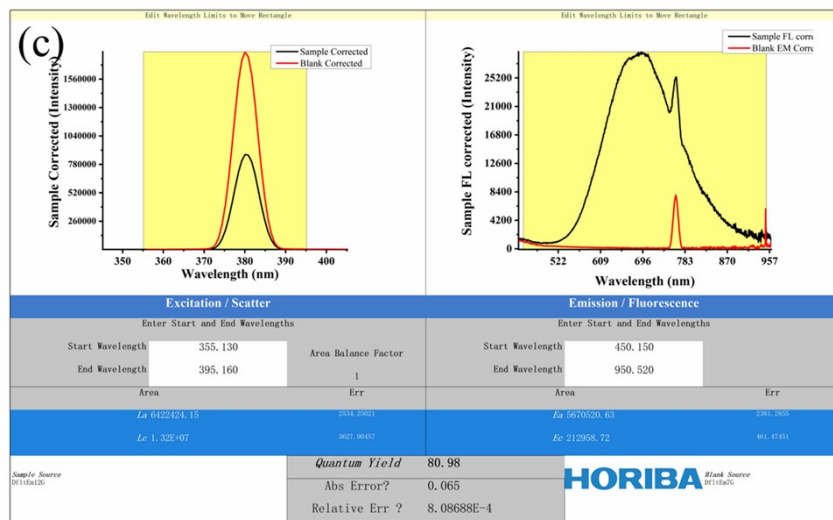

Figure S10. (a) Plot of PLQY with Sb/Sn ratio, best PLQY under 325nm excitation (b) (Sb/Sn = 20%) and 380nm excitation (c) (Sb/Sn = 20%).

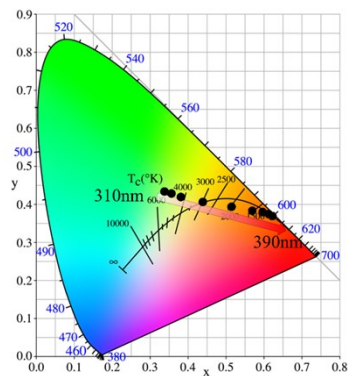

Figure S11. CIE coordinates of  $(C_{13}H_{30}N)_2SnCl_6:20\%Sb$  in the 1931 color space chromaticity

diagram under different excitation wavelengths.

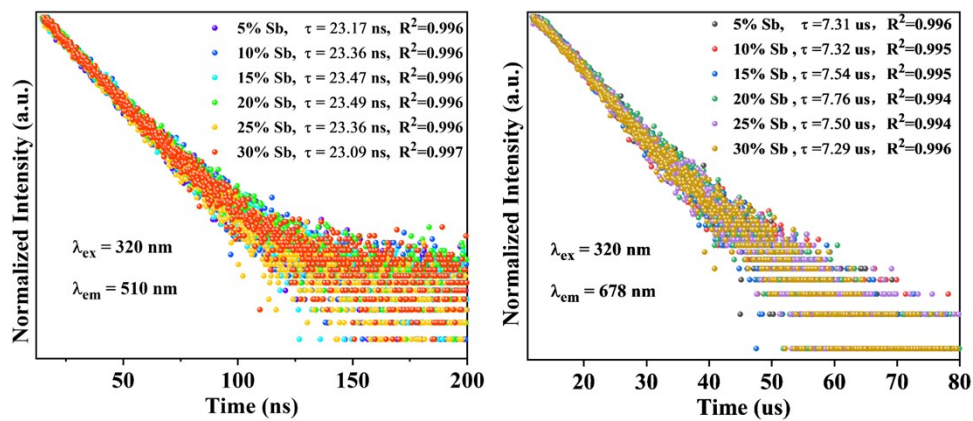

**Figure S12.** Lifetime decay curve of  $(C_{13}H_{30}N)_2SnCl_6$ : x% Sb under different emission centers.

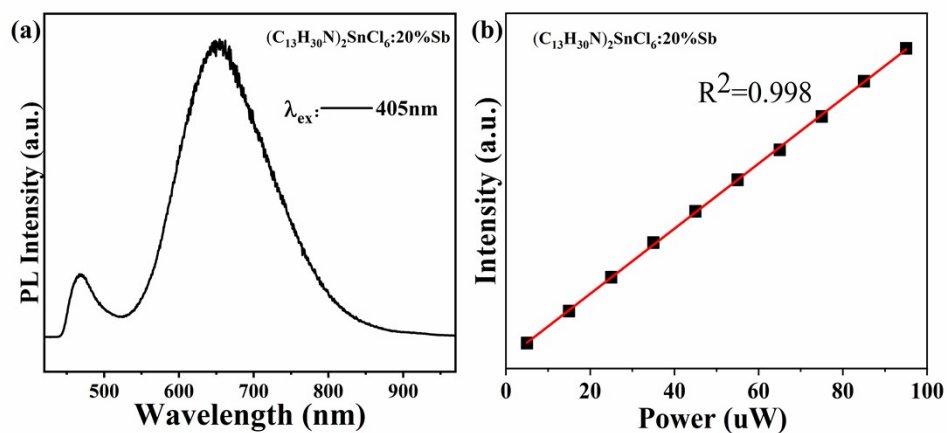

**Figure S13.** (a) PL spectra of  $(C_{13}H_{30}N)_2SnCl_6:20\%Sb$  monitored at 405nm laser. (b) The relationship between emission intensity and excitation power of  $(C_{13}H_{30}N)_2SnCl_6: 20\% Sb$  was measured using a 405nm laser. The linear fit result has a high  $R^2$  value of 0.998.

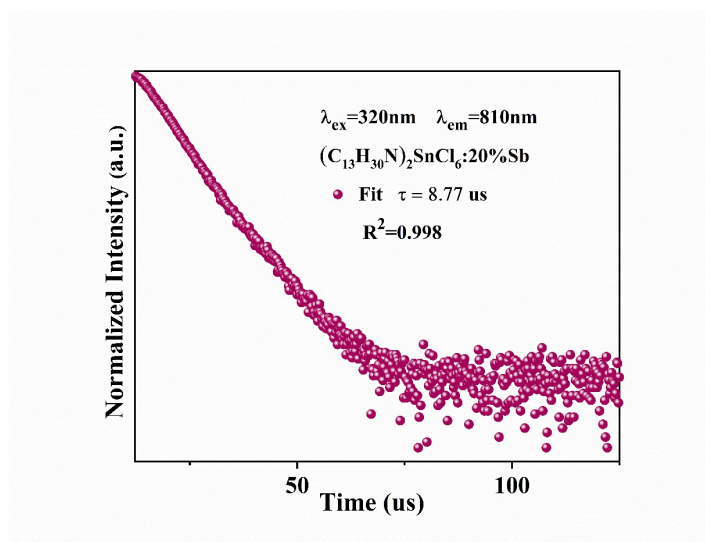

**Figure S14.** Lifetime decay curve of  $(C_{13}H_{30}N)_2SnCl_6: 20\% Sb$  at 810 nm.

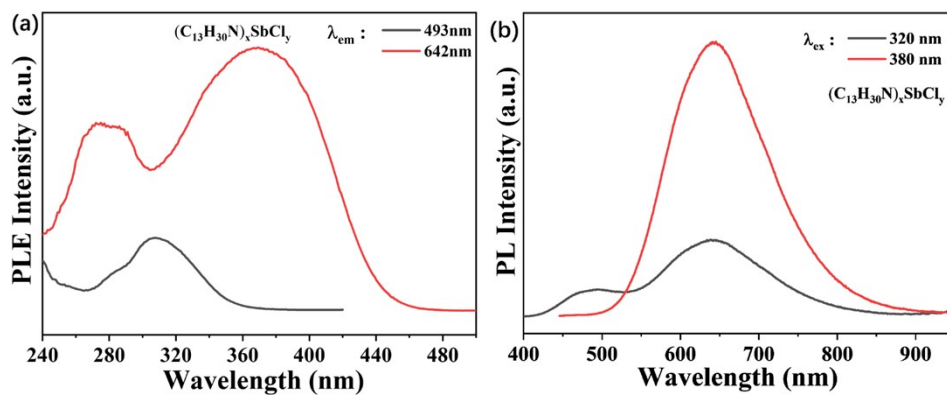

Figure S15. PLE (a) and PL (b) spectrum of  $(C_{13}H_{30}N)_xSbCl_4$ .

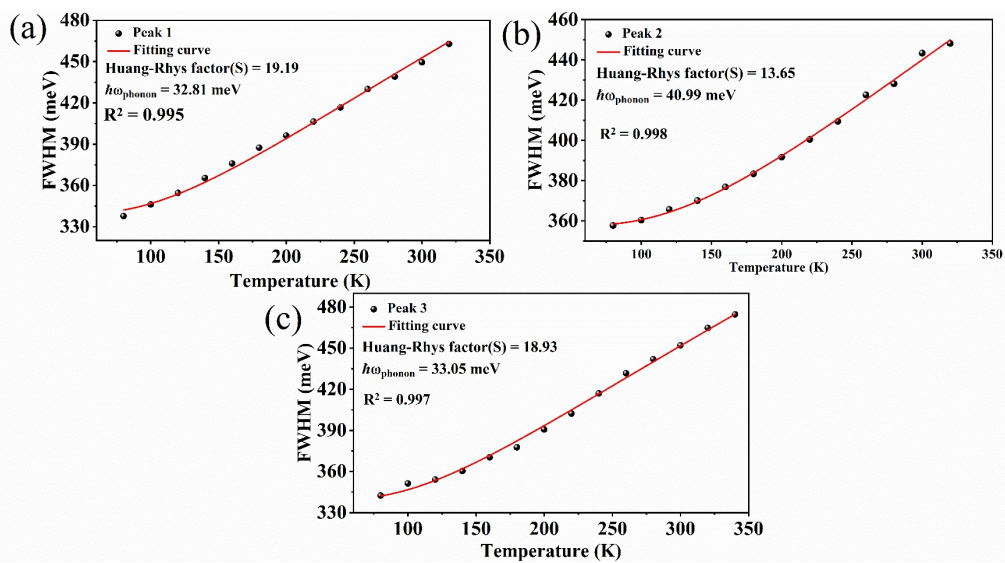

Figure S16. The fitting results of full width at half maximum (FWHM) as a function of temperature for (a)Peak 1, (b)Peak 2 and (c)Peak 3.



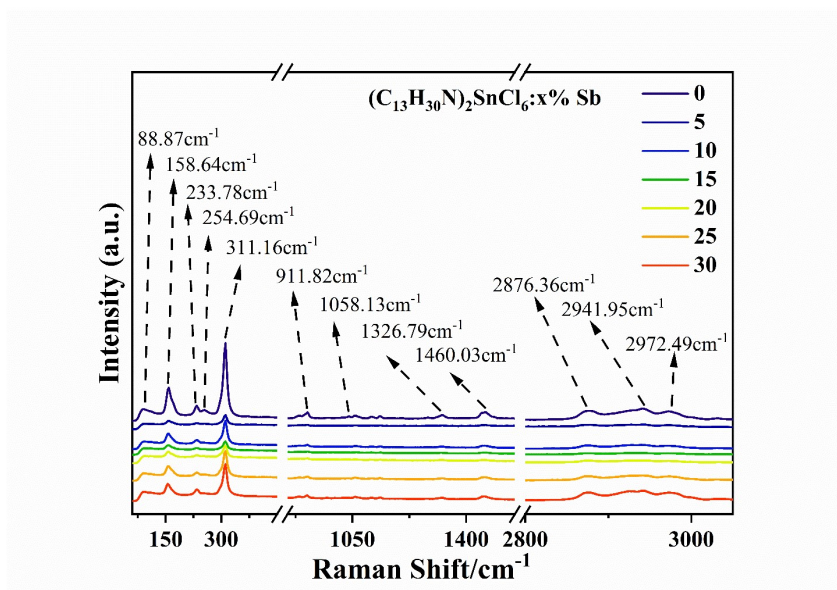

**Figure S17.** Raman spectrum (60-3050  $\text{cm}^{-1}$ ) excited by 633 nm laser.

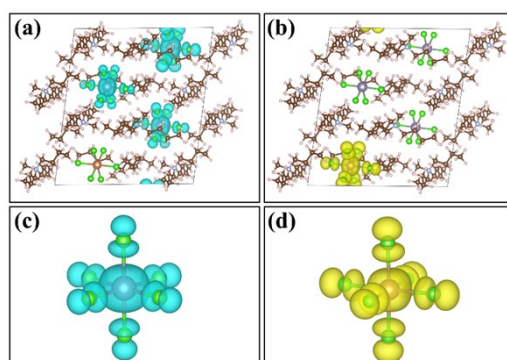

**Figure S18.** Partial charge densities of (a) CBM and (b) VBM in  $\text{Sb}^{3+}$ -doped  $(\text{C}_{13}\text{H}_{30}\text{N})_2\text{SnCl}_6$  with  $[\text{SbCl}_5]^{3-}$  and  $[\text{SnCl}_6]^{2-}$  units. For clarity, (c) single  $[\text{SnCl}_6]^{2-}$  and (d)  $[\text{SbCl}_5]^{3-}$  units are shown.

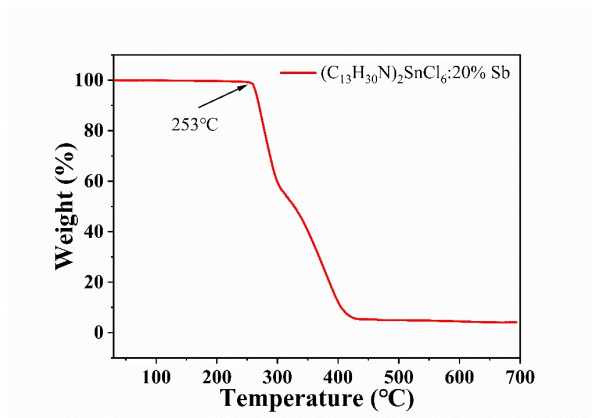

**Figure S19.** Thermogravimetric analysis (TGA) curves of  $(\text{C}_{13}\text{H}_{30}\text{N})_2\text{SnCl}_6$ : 20% Sb.

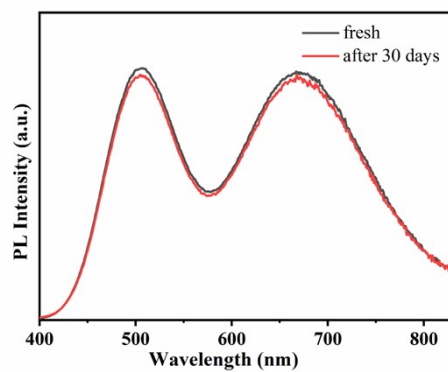

**Figure S20.** Emission intensity comparison of  $(C_{13}H_{30}N)_2SnCl_6$ : 20% Sb powder before and after exposure to air for 30 days.

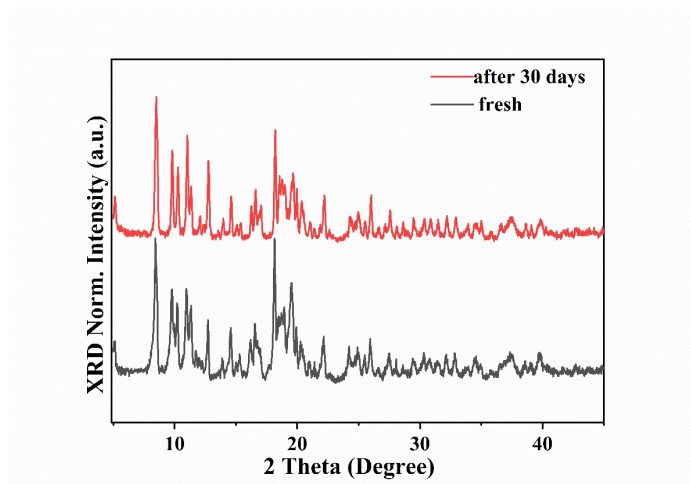

**Figure S21.** XRD comparison of  $(C_{13}H_{30}N)_2SnCl_6$ : 20% Sb powder before and after exposure to air for 30 days.

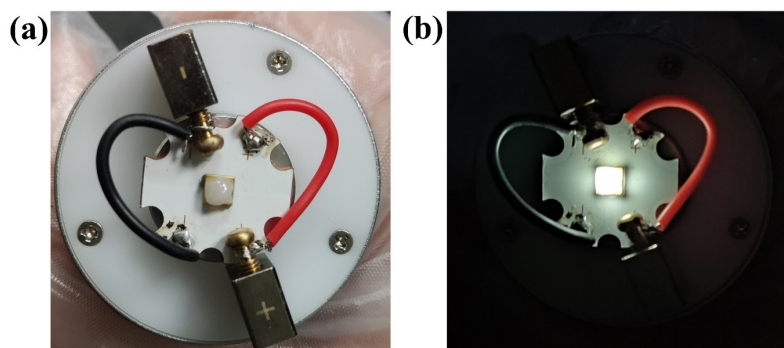

**Figure S22.** Photographs of WLED devices under daylight and 90mA drive current.

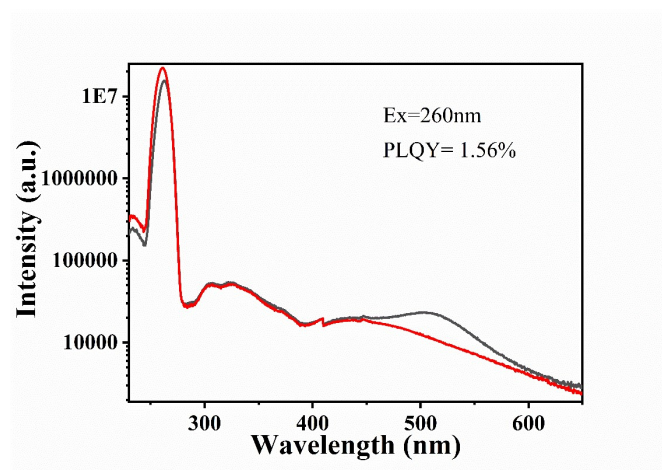

**Figure S23.** The PLQY of  $(C_{13}H_{30}N)_2SnCl_6$  at 260nm.

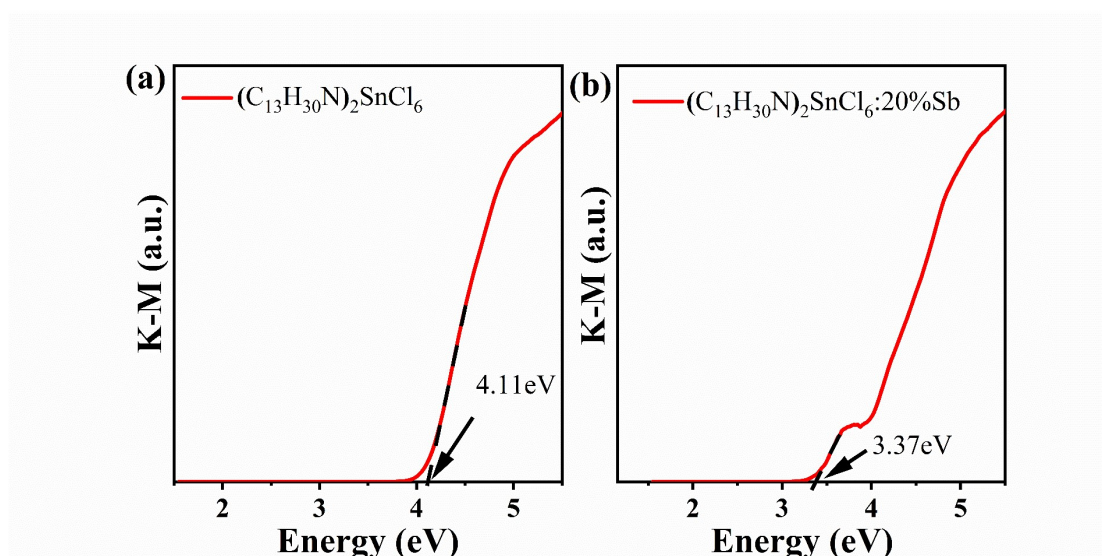

**Figure S24.** Experimental band gap values of  $(C_{13}H_{30}N)_2SnCl_6$  (a) and  $(C_{13}H_{30}N)_2SnCl_6:20\%Sb$  (b).

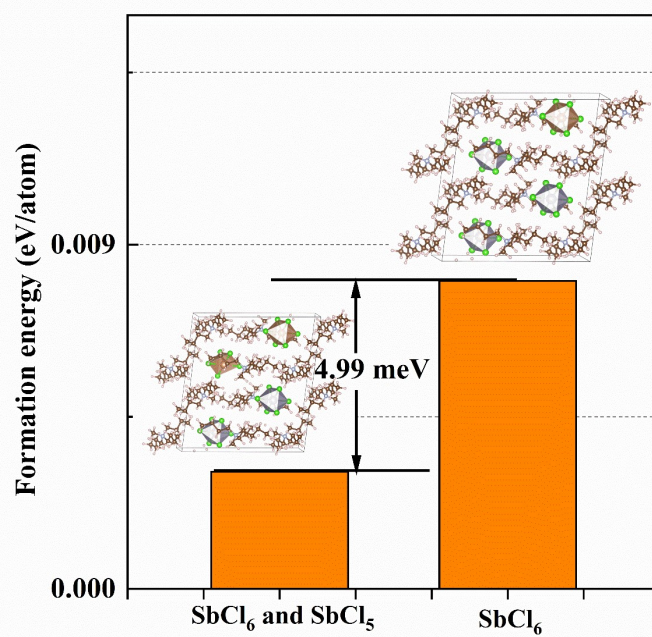

**Figure S25.** Formation energy comparison diagram of only SbCl<sub>6</sub> clusters and simultaneous formation of SbCl<sub>5</sub> and SbCl<sub>6</sub> clusters in (C<sub>13</sub>H<sub>30</sub>N)<sub>2</sub>SnCl<sub>6</sub>.

**Table S7.** Comparison of this work with already reported PLQY and CRI properties of tin (IV)

halides.

| Chemical formula                                           | Highest CRI | Highest PLQY (%) | CIE of the sample           | CIE of LED devices | Stokes shift (nm) | FWHM (nm) | PL Peak position (nm) | Ref.      |
|------------------------------------------------------------|-------------|------------------|-----------------------------|--------------------|-------------------|-----------|-----------------------|-----------|
| $(C_{13}H_{30}N)_2SnCl_6$ : Sb                             | 96.7        | 99.32            | (0.36,0.42)                 | (0.346,0.38)       | 185/298           | ~171      | 510/678               | this work |
| $(C_9H_8N)_2SnCl_6$                                        | N/A         | 41               | (0.16,0.12)                 | N/A                | 144               | 86        | 433                   | 1         |
| $(4\text{-APEA})_2SnBr_6$                                  | N/A         | 27               | (0.44,0.52)                 | N/A                | 222               | 111       | 566                   | 2         |
| $C_{16}H_{22}Cl_6F_2N_2Sn$ /<br>$C_{16}H_{22}Br_6F_2N_2Sn$ | N/A         | N/A              | N/A                         | N/A                | N/A               | N/A       | N/A                   | 3         |
| $(C_6N_2H_{16}Cl)_2SnCl_6$                                 | N/A         | 8.1              | (0.21,0.24)                 | N/A                | 75                | 125       | 450                   | 4         |
| $(C_9H_{14}N)_2[SnCl_6]$                                   | N/A         | N/A              | N/A                         | N/A                | 114               | N/A       | 407                   | 5         |
| $(C_5H_{14}N_2)_2[SnCl_6]_2 \cdot 5H_2O$                   | N/A         | N/A              | N/A                         | N/A                | N/A               | N/A       | 600                   | 6         |
| $(C_5N_2H_{14})SnCl_6$                                     | 97          | N/A              | (0.39,0.43)/<br>(0.45,0.43) | N/A                | 367/380           | 203/254   | 570/680               | 7         |
| $(Ph_3S)_2SnCl_6$                                          | N/A         | 17.5             | N/A                         | N/A                | 27/150            | N/A       | 382/505               | 8         |
| $(Ph_3S)_2Sn_{1-x}Te_xCl_6$                                | N/A         | 2.5              | N/A                         | N/A                | 240/165           | N/A       | 595/520               | 8         |
| $(NH_4)_2SnCl_6$ : Te                                      | 88          | 83.51            | N/A                         | (0.31,0.29)        | 200               | 127       | 590                   | 9         |
| $(C_8H_{22}N_2Cl)_2SnCl_6$ : Sb                            | N/A         | 41.76            | N/A                         | N/A                | 350               | 178       | 690                   | 10        |
| $(C_{10}H_{16}N_2)SnCl_6$ :Sb                              | 84          | 77               | N/A                         | (0.32,0.34)        | N/A               | N/A       | 500/600               | 11        |
| $(NH_4)_2SnCl_6$ :Sb                                       | N/A         | 58               | N/A                         | N/A                | 200/374           | N/A       | 590/734               | 12        |
| $Cs_2SnCl_6$ : Sb                                          | 81          | 37               | (0.55,0.45)                 | (0.30,0.37)        | 101               | 237       | 605                   | 13        |
| $Cs_2SnBr_6$                                               | 84.09       | 31               | N/A                         | (0.52,0.41)        | 255               | 121       | 600                   | 14        |
| $Cs_2SnCl_6$ : Bi                                          | N/A         | 78.9             | N/A                         | (0.36, 0.37)       | 95                | 66        | 455                   | 15        |
| $Cs_2Sn_{1-x}Te_xCl_6$                                     | N/A         | 95.4             | N/A                         | N/A                | 120               | >100      | 580                   | 16        |
| $Rb_2SnCl_6$ :Bi                                           | N/A         | 21               | N/A                         | N/A                | 70                | 65        | 426                   | 17        |
| $Cs_2Pt_xSn_{1-x}Cl_6$                                     | N/A         | 22               | N/A                         | N/A                | 180               | 110       | 640/433               | 18        |
| $Cs_2SnCl_6$ :Te                                           | N/A         | 42.3             | N/A                         | N/A                | 188               | N/A       | 573                   | 19        |

## references

1. S. Zhou, L. Zhou, Y. Chen, W. Shen, M. Li and R. He, *J. Phys. Chem. Lett.*, 2022, **13**, 8717-8724.
2. Q. Chen, M. Zhang, F. Dai, L. Zhao, S. Liu, H. Zhao, H. Zhou, L. Teng, W. Xu, L. Wang and J. Xing, *Adv. Opt. Mater.*, 2022, **11**, 2202475.

3. X. You, J. Yao and Z. Wei, *Dalton Trans.*, 2020, **49**, 7252-7257.
4. G. Song, M. Li, Y. Yang, F. Liang, Q. Huang, X. Liu, P. Gong, Z. Xia and Z. Lin, *J. Phys. Chem. Lett.*, 2020, **11**, 1808-1813.
5. I. Feddaoui, M. S. M. Abdelbaky, S. García-Granda, K. Essalah, C. Ben Nasr and M. L. Mrad, *J. Mol. Struct.*, 2019, **1186**, 31-38.
6. S. BelhajSalah, M. S. M. Abdelbaky, S. García-Granda, K. Essalah, C. Ben Nasr and M. L. Mrad, *Solid State Sci.*, 2018, **86**, 77-85.
7. G. Song, Z. Li, P. Gong, R. J. Xie and Z. Lin, *Adv. Opt. Mater.*, 2021, **9**, 2002246.
8. Z. Luo, Y. Liu, Y. Liu, C. Li, Y. Li, Q. Li, Y. Wei, L. Zhang, B. Xu, X. Chang and Z. Quan, *Adv. Mater.*, 2022, **34**, 2200607.
9. Z. Li, C. Zhang, B. Li, C. Lin, Y. Li, L. Wang and R.-J. Xie, *Chem. Eng. J.*, 2021, **420**, 129740.
10. L. Zhou, L. Zhang, H. Li, W. Shen, M. Li and R. He, *Adv. Funct. Mater.*, 2021, **31**, 2108561.
11. G. Zhang, P. Dang, H. Xiao, H. Lian, S. Liang, L. Yang, Z. Cheng, G. Li and J. Lin, *Adv. Opt. Mater.*, 2021, **9**, 2101637.
12. H. Lin, Q. Wei, B. Ke, W. Lin, H. Zhao and B. Zou, *J. Phys. Chem. Lett.*, 2023, **14**, 1460-1469.
13. J. Li, Z. Tan, M. Hu, C. Chen, J. Luo, S. Li, L. Gao, Z. Xiao, G. Niu and J. Tang, *Front. Optoelectron.*, 2019, **12**, 352-364.
14. C.-F. Lai, Y.-C. Chang and Y.-C. Tien, *ACS Appl. Nano Mater.*, 2021, **4**, 1924-1931.
15. Z. Tan, J. Li, C. Zhang, Z. Li, Q. Hu, Z. Xiao, T. Kamiya, H. Hosono, G. Niu, E. Lifshitz, Y. Cheng and J. Tang, *Adv. Funct. Mater.*, 2018, **28**, 1801131.
16. Z. Tan, Y. Chu, J. Chen, J. Li, G. Ji, G. Niu, L. Gao, Z. Xiao and J. Tang, *Adv. Mater.*, 2020, **32**, 2002443.
17. S. A. Qamar, T.-W. Lin, Y.-T. Tsai and C. C. Lin, *ACS Appl. Nano Mater.*, 2022, **5**, 7580-7587.
18. H. Yin, J. Chen, P. Guan, D. Zheng, Q. Kong, S. Yang, P. Zhou, B. Yang, T. Pullerits and K. Han, *Angew. Chem., Int. Ed.*, 2021, **60**, 22693-22699.
19. R. Zeng, K. Bai, Q. Wei, T. Chang, J. Yan, B. Ke, J. Huang, L. Wang, W. Zhou, S. Cao, J. Zhao and B. Zou, *Nano Res.*, 2020, **14**, 1551-1558.
